# Supplementary material for: Derivation of the Reduced Reaction Mechanisms of Ozone Depletion Events in Polar Spring by Using Concentration Sensitivity Analysis and Principal Component Analysis
Source: Copernicus journal article supplement (doi:10.5194/acp-2016-618), 2016-08-29
Supplement: Supplementary file 1 [file acp-2016-618-supplement.pdf]

**Table S1.** The original chemical reaction mechanism with an assumption of a 200 m boundary layer. A constant temperature  $T = 258$  K is assumed in the model, and the rate of third-body reactions is estimated as  $k = k_{\infty} \times \frac{k_0/k_{\infty}}{(1+k_0/k_{\infty})} \times F_c^{1+(\log_{10}(k_0/k_{\infty}))^2}$  (Atkinson et al., 2006).

| Reaction Number | Reaction                                                       | $k$<br>[(molec. cm <sup>-3</sup> ) <sup>1-n</sup> s <sup>-1</sup> ]                                                                            | Order<br>$n$ | Reference              |
|-----------------|----------------------------------------------------------------|------------------------------------------------------------------------------------------------------------------------------------------------|--------------|------------------------|
| (R1)            | $O_3 + h\nu \rightarrow O(^1D) + O_2$                          | $4.70 \times 10^{-7}$                                                                                                                          | 1            | Lehrer et al. (2004)   |
| (R2)            | $O(^1D) + O_2 \rightarrow O_3$                                 | $3.20 \times 10^{-11} \exp(67/T)$                                                                                                              | 2            | Atkinson et al. (2006) |
| (R3)            | $O(^1D) + N_2 \rightarrow O_3 + N_2$                           | $1.80 \times 10^{-11} \exp(107/T)$                                                                                                             | 2            | Atkinson et al. (2006) |
| (R4)            | $O(^1D) + H_2O \rightarrow 2OH$                                | $2.20 \times 10^{-10}$                                                                                                                         | 2            | Atkinson et al. (2006) |
| (R5)            | $Br + O_3 \rightarrow BrO + O_2$                               | $1.70 \times 10^{-11} \exp(-800/T)$                                                                                                            | 2            | Atkinson et al. (2006) |
| (R6)            | $Br_2 + h\nu \rightarrow 2Br$                                  | 0.021                                                                                                                                          | 1            | Lehrer et al. (2004)   |
| (R7)            | $BrO + h\nu \xrightarrow{O_2} Br + O_3$                        | 0.014                                                                                                                                          | 1            | Lehrer et al. (2004)   |
| (R8)            | $BrO + BrO \rightarrow 2Br + O_2$                              | $2.70 \times 10^{-12}$                                                                                                                         | 2            | Atkinson et al. (2006) |
| (R9)            | $BrO + BrO \rightarrow Br_2 + O_2$                             | $2.90 \times 10^{-14} \exp(840/T)$                                                                                                             | 2            | Atkinson et al. (2006) |
| (R10)           | $BrO + HO_2 \rightarrow HOBr + O_2$                            | $4.5 \times 10^{-12} \exp(500/T)$                                                                                                              | 2            | Atkinson et al. (2006) |
| (R11)           | $HOBr + h\nu \rightarrow Br + OH$                              | $3.00 \times 10^{-4}$                                                                                                                          | 1            | Lehrer et al. (2004)   |
| (R12)           | $CO + OH(+M) \xrightarrow{O_2} HO_2 + CO_2(+M)$                | $1.44 \times 10^{-13} (1 + \frac{[N_2]}{4 \times 10^{19}})$                                                                                    | 2            | Atkinson et al. (2006) |
| (R13)           | $Br + HO_2 \rightarrow HBr + O_2$                              | $7.70 \times 10^{-12} \exp(-450/T)$                                                                                                            | 2            | Atkinson et al. (2006) |
| (R14)           | $HOBr + HBr \xrightarrow{\text{aerosol}} Br_2 + H_2O$          | $(\frac{r}{D_g} + \frac{4}{v_{\text{therm}} \gamma})^{-1} \alpha_{\text{eff, aerosol}}$                                                        |              | Cao et al. (2014)      |
| (R15)           | $HOBr + H^+ + Br^- \xrightarrow{\text{ice}} Br_2 + H_2O$       | $(r_a + r_b + r_c)^{-1} \alpha_{\text{eff, ice}}$                                                                                              |              | Cao et al. (2014)      |
| (R16)           | $Br + HCHO \xrightarrow{O_2} HBr + CO + HO_2$                  | $7.70 \times 10^{-12} \exp(-580/T)$                                                                                                            | 2            | Atkinson et al. (2006) |
| (R17)           | $Br + CH_3CHO \xrightarrow{O_2} HBr + CH_3CO_3$                | $1.80 \times 10^{-11} \exp(-460/T)$                                                                                                            | 2            | Atkinson et al. (2006) |
| (R18)           | $Br_2 + OH \rightarrow HOBr + Br$                              | $2.0 \times 10^{-11} \exp(240/T)$                                                                                                              | 2            | Atkinson et al. (2006) |
| (R19)           | $HBr + OH \rightarrow H_2O + Br$                               | $5.50 \times 10^{-12} \exp(205/T)$                                                                                                             | 2            | Atkinson et al. (2006) |
| (R20)           | $Br + C_2H_2 \xrightarrow{3O_2} 2CO + 2HO_2 + Br$              | $4.20 \times 10^{-14}$                                                                                                                         | 2            | Borken (1996)          |
| (R21)           | $Br + C_2H_2 \xrightarrow{2O_2} 2CO + HO_2 + HBr$              | $8.92 \times 10^{-14}$                                                                                                                         | 2            | Borken (1996)          |
| (R22)           | $Br + C_2H_4 \xrightarrow{3.5O_2} 2CO + 2HO_2 + Br + H_2O$     | $2.52 \times 10^{-13}$                                                                                                                         | 2            | Barnes et al. (1993)   |
| (R23)           | $Br + C_2H_4 \xrightarrow{2.5O_2} 2CO + HO_2 + HBr + H_2O$     | $5.34 \times 10^{-13}$                                                                                                                         | 2            | Barnes et al. (1993)   |
| (R24)           | $CH_4 + OH \xrightarrow{O_2} CH_3O_2 + H_2O$                   | $1.85 \times 10^{-12} \exp(-1690/T)$                                                                                                           | 2            | Atkinson et al. (2006) |
| (R25)           | $BrO + CH_3O_2 \rightarrow Br + HCHO + HO_2$                   | $1.60 \times 10^{-12}$                                                                                                                         | 2            | Aranda et al. (1997)   |
| (R26)           | $BrO + CH_3O_2 \rightarrow HOBr + HCHO + 0.5O_2$               | $4.10 \times 10^{-12}$                                                                                                                         | 2            | Aranda et al. (1997)   |
| (R27)           | $OH + O_3 \rightarrow HO_2 + O_2$                              | $1.70 \times 10^{-12} \exp(-940/T)$                                                                                                            | 2            | Atkinson et al. (2006) |
| (R28)           | $OH + HO_2 \rightarrow H_2O + O_2$                             | $4.80 \times 10^{-11} \exp(250/T)$                                                                                                             | 2            | Atkinson et al. (2006) |
| (R29)           | $OH + H_2O_2 \rightarrow HO_2 + H_2O$                          | $2.90 \times 10^{-12} \exp(-160/T)$                                                                                                            | 2            | Atkinson et al. (2006) |
| (R30)           | $OH + OH \xrightarrow{O_2} H_2O + O_3$                         | $6.20 \times 10^{-14} (T/298)^{2.6} \exp(945/T)$                                                                                               | 2            | Atkinson et al. (2006) |
| (R31)           | $HO_2 + O_3 \rightarrow OH + 2O_2$                             | $2.03 \times 10^{-16} (T/300)^{4.57} \exp(693/T)$                                                                                              | 2            | Atkinson et al. (2006) |
| (R32)           | $HO_2 + HO_2 \rightarrow O_2 + H_2O_2$                         | $2.20 \times 10^{-13} \exp(600/T)$                                                                                                             | 2            | Atkinson et al. (2006) |
| (R33)           | $C_2H_6 + OH \rightarrow C_2H_5 + H_2O$                        | $6.90 \times 10^{-12} \exp(-1000/T)$                                                                                                           | 2            | Atkinson et al. (2006) |
| (R34)           | $C_2H_5 + O_2 \rightarrow C_2H_4 + HO_2$                       | $3.80 \times 10^{-15}$                                                                                                                         | 2            | Atkinson et al. (2006) |
| (R35)           | $C_2H_5 + O_2(+M) \rightarrow C_2H_5O_2(+M)$                   | $k_0 = 5.90 \times 10^{-29} (T/300)^{-3.8} [N_2]$<br>$k_{\infty} = 7.80 \times 10^{-12}$<br>$F_c = 0.58 \exp(-T/1250)$<br>$+0.42 \exp(-T/183)$ | 2            | Atkinson et al. (2006) |
| (R36)           | $C_2H_4 + OH(+M) \xrightarrow{1.5O_2} CH_3O_2 + CO + H_2O(+M)$ | $k_0 = 8.60 \times 10^{-29} (T/300)^{-3.1} [N_2]$<br>$k_{\infty} = 9.00 \times 10^{-12} (T/300)^{-0.85}$<br>$F_c = 0.48$                       | 2            | Atkinson et al. (2006) |
| (R37)           | $C_2H_4 + O_3 \rightarrow HCHO + CO + H_2O$                    | $4.33 \times 10^{-19}$                                                                                                                         | 2            | Sander et al. (1997)   |
| (R38)           | $C_2H_2 + OH(+M) \xrightarrow{1.5O_2} HCHO + CO + HO_2(+M)$    | $k_0 = 5.00 \times 10^{-30} (T/300)^{-1.5} [N_2]$<br>$k_{\infty} = 1.00 \times 10^{-12}$<br>$F_c = 0.37$                                       | 2            | Atkinson et al. (2006) |
| (R39)           | $C_3H_8 + OH \xrightarrow{2O_3} C_2H_5O_2 + CO + 2H_2O$        | $7.60 \times 10^{-12} \exp(-585/T)$                                                                                                            | 2            | Atkinson et al. (2006) |
| (R40)           | $HCHO + OH \xrightarrow{O_2} CO + H_2O + HO_2$                 | $5.40 \times 10^{-12} \exp(135/T)$                                                                                                             | 2            | Atkinson et al. (2006) |

| Reaction Number | Reaction                                                                                                                                               | $k$<br>[(molec. cm <sup>-3</sup> ) <sup>1-n</sup> s <sup>-1</sup> ]                                                          | Order<br>$n$ | Reference              |
|-----------------|--------------------------------------------------------------------------------------------------------------------------------------------------------|------------------------------------------------------------------------------------------------------------------------------|--------------|------------------------|
| (R41)           | $\text{CH}_3\text{CHO} + \text{OH} \xrightarrow{\text{O}_2} \text{CH}_3\text{CO}_3 + \text{H}_2\text{O}$                                               | $4.40 \times 10^{-12} \exp(365/T)$                                                                                           | 2            | Atkinson et al. (2006) |
| (R42)           | $\text{CH}_3\text{O}_2 + \text{HO}_2 \rightarrow \text{CH}_3\text{O}_2\text{H} + \text{O}_2$                                                           | $3.42 \times 10^{-13} \exp(780/T)$                                                                                           | 2            | Atkinson et al. (2006) |
| (R43)           | $\text{CH}_3\text{O}_2 + \text{HO}_2 \rightarrow \text{HCHO} + \text{H}_2\text{O} + \text{O}_2$                                                        | $3.79 \times 10^{-14} \exp(780/T)$                                                                                           | 2            | Atkinson et al. (2006) |
| (R44)           | $\text{CH}_3\text{OOH} + \text{OH} \rightarrow \text{CH}_3\text{O}_2 + \text{H}_2\text{O}$                                                             | $1.00 \times 10^{-12} \exp(190/T)$                                                                                           | 2            | Atkinson et al. (2006) |
| (R45)           | $\text{CH}_3\text{OOH} + \text{OH} \rightarrow \text{HCHO} + \text{OH} + \text{H}_2\text{O}$                                                           | $1.90 \times 10^{-12} \exp(190/T)$                                                                                           | 2            | Atkinson et al. (2006) |
| (R46)           | $\text{CH}_3\text{OOH} + \text{Br} \rightarrow \text{CH}_3\text{O}_2 + \text{HBr}$                                                                     | $2.66 \times 10^{-12} \exp(-1610/T)$                                                                                         | 2            | Mallard et al. (1993)  |
| (R47)           | $\text{CH}_3\text{O}_2 + \text{CH}_3\text{O}_2 \rightarrow \text{CH}_3\text{OH} + \text{HCHO} + \text{O}_2$                                            | $6.29 \times 10^{-14} \exp(365/T)$                                                                                           | 2            | Atkinson et al. (2006) |
| (R48)           | $\text{CH}_3\text{O}_2 + \text{CH}_3\text{O}_2 \xrightarrow{\text{O}_2} 2\text{HCHO} + 2\text{HO}_2$                                                   | $3.71 \times 10^{-14} \exp(365/T)$                                                                                           | 2            | Atkinson et al. (2006) |
| (R49)           | $\text{CH}_3\text{OH} + \text{OH} \xrightarrow{\text{O}_2} \text{HCHO} + \text{HO}_2 + \text{H}_2\text{O}$                                             | $2.42 \times 10^{-12} \exp(-345/T)$                                                                                          | 2            | Atkinson et al. (2006) |
| (R50)           | $\text{C}_2\text{H}_5\text{O}_2 + \text{C}_2\text{H}_5\text{O}_2 \rightarrow \text{C}_2\text{H}_5\text{O} + \text{C}_2\text{H}_5\text{O} + \text{O}_2$ | $6.40 \times 10^{-14}$                                                                                                       | 2            | Atkinson et al. (2006) |
| (R51)           | $\text{C}_2\text{H}_5\text{O} + \text{O}_2 \rightarrow \text{CH}_3\text{CHO} + \text{HO}_2$                                                            | $7.44 \times 10^{-15}$                                                                                                       | 2            | Sander et al. (1997)   |
| (R52)           | $\text{C}_2\text{H}_5\text{O} + \text{O}_2 \rightarrow \text{CH}_3\text{O}_2 + \text{HCHO}$                                                            | $7.51 \times 10^{-17}$                                                                                                       | 2            | Sander et al. (1997)   |
| (R53)           | $\text{C}_2\text{H}_5\text{O}_2 + \text{HO}_2 \rightarrow \text{C}_2\text{H}_5\text{OOH} + \text{O}_2$                                                 | $3.80 \times 10^{-13} \exp(900/T)$                                                                                           | 2            | Atkinson et al. (2006) |
| (R54)           | $\text{C}_2\text{H}_5\text{OOH} + \text{OH} \rightarrow \text{C}_2\text{H}_5\text{O}_2 + \text{H}_2\text{O}$                                           | $8.21 \times 10^{-12}$                                                                                                       | 2            | Sander et al. (1997)   |
| (R55)           | $\text{C}_2\text{H}_5\text{OOH} + \text{Br} \rightarrow \text{C}_2\text{H}_5\text{O}_2 + \text{HBr}$                                                   | $5.19 \times 10^{-15}$                                                                                                       | 2            | Sander et al. (1997)   |
| (R56)           | $\text{OH} + \text{OH}(+\text{M}) \rightarrow \text{H}_2\text{O}_2(+\text{M})$                                                                         | $k_0 = 6.90 \times 10^{-31} (T/300)^{-0.8} [\text{N}_2]$<br>$k_\infty = 2.60 \times 10^{-11}$<br>$F_c = 0.50$                | 2            | Atkinson et al. (2006) |
| (R57)           | $\text{H}_2\text{O}_2 + h\nu \rightarrow 2\text{OH}$                                                                                                   | $2.00 \times 10^{-6}$                                                                                                        | 1            | Lehrer et al. (2004)   |
| (R58)           | $\text{HCHO} + h\nu \xrightarrow{2\text{O}_2} 2\text{HO}_2 + \text{CO}$                                                                                | $5.50 \times 10^{-6}$                                                                                                        | 1            | Lehrer et al. (2004)   |
| (R59)           | $\text{HCHO} + h\nu \rightarrow \text{H}_2 + \text{CO}$                                                                                                | $9.60 \times 10^{-6}$                                                                                                        | 1            | Lehrer et al. (2004)   |
| (R60)           | $\text{C}_2\text{H}_4\text{O} + h\nu \rightarrow \text{CH}_3\text{O}_2 + \text{CO} + \text{HO}_2$                                                      | $6.90 \times 10^{-7}$                                                                                                        | 1            | Lehrer et al. (2004)   |
| (R61)           | $\text{CH}_3\text{O}_2\text{H} + h\nu \rightarrow \text{OH} + \text{HCHO} + \text{HO}_2$                                                               | $1.20 \times 10^{-6}$                                                                                                        | 1            | Lehrer et al. (2004)   |
| (R62)           | $\text{C}_2\text{H}_5\text{O}_2\text{H} + h\nu \rightarrow \text{C}_2\text{H}_5\text{O} + \text{OH}$                                                   | $1.20 \times 10^{-6}$                                                                                                        | 1            | Lehrer et al. (2004)   |
| (R63)           | $\text{NO} + \text{O}_3 \rightarrow \text{NO}_2 + \text{O}_2$                                                                                          | $1.40 \times 10^{-12} \exp(-1310/T)$                                                                                         | 2            | Atkinson et al. (2006) |
| (R64)           | $\text{NO} + \text{HO}_2 \rightarrow \text{NO}_2 + \text{OH}$                                                                                          | $3.60 \times 10^{-12} \exp(270/T)$                                                                                           | 2            | Atkinson et al. (2006) |
| (R65)           | $\text{NO}_2 + \text{O}_3 \rightarrow \text{NO}_3 + \text{O}_2$                                                                                        | $1.40 \times 10^{-13} \exp(-2470/T)$                                                                                         | 2            | Atkinson et al. (2006) |
| (R66)           | $\text{NO}_2 + \text{OH}(+\text{M}) \rightarrow \text{HNO}_3(+\text{M})$                                                                               | $k_0 = 3.30 \times 10^{-30} (T/300)^{-3.0} [\text{N}_2]$<br>$k_\infty = 4.10 \times 10^{-11}$<br>$F_c = 0.40$                | 2            | Atkinson et al. (2006) |
| (R67)           | $\text{NO} + \text{NO}_3 \rightarrow 2\text{NO}_2$                                                                                                     | $1.80 \times 10^{-11} \exp(110/T)$                                                                                           | 2            | Atkinson et al. (2006) |
| (R68)           | $\text{HONO} + \text{OH} \rightarrow \text{NO}_2 + \text{H}_2\text{O}$                                                                                 | $2.50 \times 10^{-12} \exp(260/T)$                                                                                           | 2            | Atkinson et al. (2006) |
| (R69)           | $\text{HO}_2 + \text{NO}_2(+\text{M}) \rightarrow \text{HNO}_4(+\text{M})$                                                                             | $k_0 = 1.80 \times 10^{-31} (T/300)^{-3.2} [\text{N}_2]$<br>$k_\infty = 4.70 \times 10^{-12}$<br>$F_c = 0.60$                | 2            | Atkinson et al. (2006) |
| (R70)           | $\text{HNO}_4(+\text{M}) \rightarrow \text{NO}_2 + \text{HO}_2(+\text{M})$                                                                             | $k_0 = 4.10 \times 10^{-5} \exp(-10650/T) [\text{N}_2]$<br>$k_\infty = 4.80 \times 10^{15} \exp(-11170/T)$<br>$F_c = 0.60$   | 1            | Atkinson et al. (2006) |
| (R71)           | $\text{HNO}_4 + \text{OH} \rightarrow \text{NO}_2 + \text{H}_2\text{O} + \text{O}_2$                                                                   | $3.20 \times 10^{-13} \exp(690/T)$                                                                                           | 2            | Atkinson et al. (2006) |
| (R72)           | $\text{NO} + \text{OH}(+\text{M}) \rightarrow \text{HONO}(+\text{M})$                                                                                  | $k_0 = 7.40 \times 10^{-31} (T/300)^{-2.4} [\text{N}_2]$<br>$k_\infty = 3.30 \times 10^{-11} (T/300)^{-0.3}$<br>$F_c = 0.81$ | 2            | Atkinson et al. (2006) |
| (R73)           | $\text{OH} + \text{NO}_3 \rightarrow \text{NO}_2 + \text{HO}_2$                                                                                        | $2.00 \times 10^{-11}$                                                                                                       | 2            | Atkinson et al. (2006) |
| (R74)           | $\text{HNO}_3 + h\nu \rightarrow \text{NO}_2 + \text{OH}$                                                                                              | $4.40 \times 10^{-8}$                                                                                                        | 1            | Lehrer et al. (2004)   |
| (R75)           | $\text{NO}_2 + h\nu \xrightarrow{\text{O}_2} \text{NO} + \text{O}_3$                                                                                   | $3.50 \times 10^{-3}$                                                                                                        | 1            | Lehrer et al. (2004)   |
| (R76)           | $\text{NO}_3 + h\nu \xrightarrow{\text{O}_2} \text{NO}_2 + \text{O}_3$                                                                                 | $1.40 \times 10^{-1}$                                                                                                        | 1            | Lehrer et al. (2004)   |
| (R77)           | $\text{NO}_3 + h\nu \rightarrow \text{NO} + \text{O}_2$                                                                                                | $1.70 \times 10^{-2}$                                                                                                        | 1            | Lehrer et al. (2004)   |
| (R78)           | $\text{NO} + \text{CH}_3\text{O}_2 \xrightarrow{\text{O}_2} \text{HCHO} + \text{HO}_2 + \text{NO}_2$                                                   | $2.30 \times 10^{-12} \exp(360/T)$                                                                                           | 2            | Atkinson et al. (2006) |
| (R79)           | $\text{NO}_3 + \text{CH}_3\text{OH} \xrightarrow{\text{O}_2} \text{HCHO} + \text{HO}_2 + \text{HNO}_3$                                                 | $9.40 \times 10^{-13} \exp(-2650/T)$                                                                                         | 2            | Atkinson et al. (2006) |
| (R80)           | $\text{NO}_3 + \text{HCHO} \xrightarrow{\text{O}_2} \text{CO} + \text{HO}_2 + \text{HNO}_3$                                                            | $5.60 \times 10^{-16}$                                                                                                       | 2            | Atkinson et al. (2006) |

| Reaction Number | Reaction                                                                                                                | $k$<br>[(molec. cm <sup>-3</sup> ) <sup>1-n</sup> s <sup>-1</sup> ]                                                          | Order<br>$n$ | Reference                 |
|-----------------|-------------------------------------------------------------------------------------------------------------------------|------------------------------------------------------------------------------------------------------------------------------|--------------|---------------------------|
| (R81)           | $\text{NO} + \text{C}_2\text{H}_5\text{O}_2 \xrightarrow{\text{O}_2} \text{CH}_3\text{CHO} + \text{NO}_2 + \text{HO}_2$ | $2.60 \times 10^{-12} \exp(380/T)$                                                                                           | 2            | Atkinson et al. (2006)    |
| (R82)           | $\text{NO} + \text{CH}_3\text{CO}_3 \xrightarrow{\text{O}_2} \text{CH}_3\text{O}_2 + \text{NO}_2 + \text{CO}_2$         | $7.50 \times 10^{-12} \exp(290/T)$                                                                                           | 2            | Atkinson et al. (2006)    |
| (R83)           | $\text{NO}_2 + \text{CH}_3\text{CO}_3 (+\text{M}) \rightarrow \text{PAN} (+\text{M})$                                   | $k_0 = 2.70 \times 10^{-28} (T/300)^{-7.1} [\text{N}_2]$<br>$k_\infty = 1.20 \times 10^{-11} (T/300)^{-0.9}$<br>$F_c = 0.30$ | 2            | Atkinson et al. (2006)    |
| (R84)           | $\text{Br} + \text{NO}_2 (+\text{M}) \rightarrow \text{BrNO}_2 (+\text{M})$                                             | $k_0 = 4.20 \times 10^{-31} (T/300)^{-2.4} [\text{N}_2]$<br>$k_\infty = 2.70 \times 10^{-11}$<br>$F_c = 0.55$                | 2            | Atkinson et al. (2006)    |
| (R85)           | $\text{Br} + \text{NO}_3 \rightarrow \text{BrO} + \text{NO}_2$                                                          | $1.60 \times 10^{-11}$                                                                                                       | 2            | Atkinson et al. (2006)    |
| (R86)           | $\text{BrO} + \text{NO}_2 (+\text{M}) \rightarrow \text{BrONO}_2 (+\text{M})$                                           | $k_0 = 4.70 \times 10^{-31} (T/300)^{-3.1} [\text{N}_2]$<br>$k_\infty = 1.80 \times 10^{-11}$<br>$F_c = 0.40$                | 2            | Atkinson et al. (2006)    |
| (R87)           | $\text{BrO} + \text{NO} \rightarrow \text{Br} + \text{NO}_2$                                                            | $8.70 \times 10^{-12} \exp(260/T)$                                                                                           | 2            | Atkinson et al. (2006)    |
| (R88)           | $\text{BrONO}_2 + h\nu \rightarrow \text{NO}_2 + \text{BrO}$                                                            | $3.40 \times 10^{-4}$                                                                                                        | 1            | Lehrer et al. (2004)      |
| (R89)           | $\text{BrNO}_2 + h\nu \rightarrow \text{NO}_2 + \text{Br}$                                                              | $9.30 \times 10^{-5}$                                                                                                        | 1            | Lehrer et al. (2004)      |
| (R90)           | $\text{BrONO}_2 + \text{H}_2\text{O} \xrightarrow{\text{aerosol}} \text{HOBr} + \text{HNO}_3$                           | $(\frac{r}{D_g} + \frac{4}{v_{\text{therm}} \gamma})^{-1} \alpha_{\text{eff, aerosol}}$                                      |              | Cao et al. (2014)         |
| (R91)           | $\text{PAN} + h\nu \rightarrow \text{NO}_2 + \text{CH}_3\text{CO}_3$                                                    | $6.79 \times 10^{-7}$                                                                                                        | 1            | Fishman and Carney (1984) |
| (R92)           | $\text{BrONO}_2 + \text{H}_2\text{O} \xrightarrow{\text{ice}} \text{HOBr} + \text{HNO}_3$                               | $(r_a + r_b + r_c)^{-1} \alpha_{\text{eff, ice}}$                                                                            |              | Cao et al. (2014)         |

## References

- Aranda, A., Le Bras, G., La Verdet, G., and Poulet, G.: The  $\text{BrO} + \text{CH}_3\text{O}_2$  reaction: Kinetics and role in the atmospheric ozone budget, *Geophys. Res. Lett.*, 24, 2745–2748, doi:10.1029/97GL02686, 1997.
- Atkinson, R., Baulch, D. L., Cox, R. A., Crowley, J. N., Hampson, R. F., Hynes, R. G., Jenkin, M. E., Kerr, J. A., Rossi, M., and Troe, J.: Summary of evaluated kinetic and photochemical data for atmospheric chemistry, Tech. rep., 2006.
- Barnes, I., Becker, K., and Overath, R.: Oxidation of organic sulfur compounds, in: *The Tropospheric Chemistry of Ozone in the Polar Regions*, edited by Niki, H. and Becker, K., vol. 7, pp. 371–383, Springer Berlin Heidelberg, doi:10.1007/978-3-642-78211-4\_27, 1993.
- Borken, J.: *Ozonabbau durch Halogene in der arktischen Grenzschicht*, Ph.D. thesis, Heidelberg University, 1996.
- Cao, L., Sihler, H., Platt, U., and Gutheil, E.: Numerical analysis of the chemical kinetic mechanisms of ozone depletion and halogen release in the polar troposphere, *Atmos. Chem. Phys.*, 14, 3771–3787, doi:10.5194/acp-14-3771-2014, 2014.
- Fishman, J. and Carney, T. A.: A one-dimensional photochemical model of the troposphere with planetary boundary-layer parameterization, *J. Atmos. Chem.*, 1, 351–376, 1984.
- Lehrer, E., Hönninger, G., and Platt, U.: A one dimensional model study of the mechanism of halogen liberation and vertical transport in the polar troposphere, *Atmos. Chem. Phys.*, 4, 2427–2440, doi:10.5194/acp-4-2427-2004, 2004.
- Mallard, W. G., Westley, F., Herron, J. T., Hampson, R. F., and Frizzel, D. H.: *NIST chemical kinetics database: version 5.0*, Tech. rep., Gaithersburg, 1993.
- Sander, R., Vogt, R., Harris, G. W., and Crutzen, P. J.: Modelling the chemistry of ozone, halogen compounds, and hydrocarbons in the arctic troposphere during spring, *Tellus B*, 49, 522–532, doi:10.1034/j.1600-0889.49.issue5.8.x, 1997.
